# Supplementary material for: A simple equation to estimate body fat percentage in children with overweightness or obesity: a retrospective study
Source: PeerJ. 2017 Apr 27;5:e3238. doi: 10.7717/peerj.3238 (PMC5410155; doi:10.7717/peerj.3238)
Supplement: Table S1 [file peerj-05-3238-s001.xlsx]

## Sheet: Hoja1
								V1	V2	V3	V4	V5	V6	V7	V8	V9	V10	Fat	FMI
Please, fill in the fields of this form in order to calculate the body fat percentage and the fat mass index								62.6274	-11245.6	-259.114	2.30969	-0.151259	18.6548	0.00684053	-293.601	0.111935	-0.0175822	41.1631	10.4157
Male gender	1		1 if male gender and 0 otherwise
Weight (kg)	40.1
Height (m)	1.29
Age (years)	6.6
		Body fat (%)	41.1631
		Fat mass index (kg/m2)	10.4157
BMI	24.0971
Model 1
Intercept	BMI_2	BMI_Male_1	Age_Male1	Age_Male2
1	0.00172215	0.0414988	6.6	43.56
Model 1
Intercept	BMI2	BMI_1	Age_Male1	Age_Male2
1	580.671	0.0414988	6.6	43.56
